# Supplementary material for: Clinical Considerations for Insulin Pharmacotherapy in Ambulatory Care, Part Two: Review of Primary Literature and an Evidence-Based Approach for Treatment
Source: PubMed Central journal article supplement — Clin Diabetes. 2015 Jan;33(1):20–7. doi: 10.2337/diaclin.33.1.20 (PMC4299748; doi:10.2337/diaclin.33.1.20), 2015-01
Supplement: supp_33.1.20_GALDO_TABLES.pdf [file supp_33.1.20_GALDO_TABLES.pdf]

TABLE 1. Select Clinical Trials on Basal Insulin Dosing and Titration

| Clinical Trial                                  | Design/ Primary Objective                                                                                                                                                                | Population                                                                                                                                                                         | Intervention                                                                                                                                                                                                                                                                                                                                                                                                      | Results                                                                                                                                                                                | Conclusions/ Comments                                                                                                                                                                                                                                                                                                                                                              |
|-------------------------------------------------|------------------------------------------------------------------------------------------------------------------------------------------------------------------------------------------|------------------------------------------------------------------------------------------------------------------------------------------------------------------------------------|-------------------------------------------------------------------------------------------------------------------------------------------------------------------------------------------------------------------------------------------------------------------------------------------------------------------------------------------------------------------------------------------------------------------|----------------------------------------------------------------------------------------------------------------------------------------------------------------------------------------|------------------------------------------------------------------------------------------------------------------------------------------------------------------------------------------------------------------------------------------------------------------------------------------------------------------------------------------------------------------------------------|
| <i>Insulin glargine</i>                         |                                                                                                                                                                                          |                                                                                                                                                                                    |                                                                                                                                                                                                                                                                                                                                                                                                                   |                                                                                                                                                                                        |                                                                                                                                                                                                                                                                                                                                                                                    |
| Treat-to-Target Trial, Riddle et al., 2003 (23) | RCT, parallel-group, multicenter, open-label, 24-week<br>Percentage of subjects achieving A1C ≤7% without a single instance of symptomatic nocturnal hypoglycemia                        | n = 756<br>Inclusion criteria: 30–70 years of age, type 2 diabetes for ≥2 years, A1C >7.5–10%, stable dose of 1–2 OADs for ≥3 months, BMI 26–40 kg/m <sup>2</sup> , FPG ≥140 mg/dL | n = 367: insulin glargine, 10 units at bedtime<br>n = 389: NPH, 10 units at bedtime<br>OADs were continued at prestudy doses                                                                                                                                                                                                                                                                                      | Primary end point was achieved by more subjects treated with insulin glargine than with NPH (33.2 vs. 26.7%, P <0.05)                                                                  | Systematic titration of bedtime basal insulin added to oral therapy safely achieved a 7% A1C in the majority of patients studied.<br>Insulin glargine causes significantly less nocturnal hypoglycemia than NPH during forced titration.<br>This study excluded patients who previously used insulin.<br>There was a larger percentage of Hispanics in the insulin glargine group. |
| AT.LANTUS trial, Davies et al., 2005 (24)       | RCT, parallel-group, multicenter, open-label, 24-week<br>Compare physician-managed vs. patient-managed insulin glargine titration algorithm in terms of incidence of severe hypoglycemia | n = 4,961<br>Inclusion criteria: ≥18 years of age, antidiabetic therapy >6 months requiring long-acting insulin, A1C >7 to <12%, BMI <40 kg/m <sup>2</sup>                         | n = 2,493: algorithm 1, 10 units of evening insulin glargine if insulin naive or conversion to equivalent dose of glargine if previously treated with basal insulin<br>n = 2,468: algorithm 2, evening insulin glargine at a dose equivalent to the highest FPG value (in mmol/L) over the previous 7 days if insulin naive or conversion to equivalent dose of glargine if previously treated with basal insulin | No significant difference in the incidence of severe hypoglycemia between a physician-managed and a patient-managed algorithm using insulin glargine (0.9 vs. 1.1%, [90% CI 0.3–0.7])  | Both algorithms had a low incidence of severe hypoglycemia, with no incident difference.<br>Subjects had a mean duration of type 2 diabetes of 12 years and a 5-year mean duration of insulin pretreatment.<br>72% of subjects were pretreated with insulin at inclusion.<br>This study provided two simple, widely applicable treatment algorithms for insulin glargine.          |
| INSIGHT trial, Gerstein et al., 2006 (25)       | RCT, multicenter, open-label, 24-week<br>First achievement of two consecutive A1C levels ≤6.5%                                                                                           | n = 405<br>Inclusion criteria: 18–80 years of age, type 2 diabetes ≥6 months, A1C 7.5–11%, 0–2 OADs                                                                                | n = 206: insulin glargine, 10 units in the evening<br>n = 199: conventional therapy OAD intensification                                                                                                                                                                                                                                                                                                           | Patients receiving insulin glargine reached two consecutive A1C levels ≤6.5% before the conventional group and were 1.68 times more likely to achieve the end point (95% CI 1.00–2.83, | Adding insulin glargine is more likely to achieve a lower A1C level than conventional therapy with OADs.                                                                                                                                                                                                                                                                           |

P = 0.049)

*Insulin detemir*

|                                                                   |                                                                                                            |                                                                                                                                   |                                                                                                                                                                                                                                                                                                                                                                                                                                                                                  |                                                                                                                                                                                                                                                                                                                                                                                 |                                                                                                                                                                                                                                                                                                                                                                                                                                                                                                                                                                                                                                                                                                                                                                              |
|-------------------------------------------------------------------|------------------------------------------------------------------------------------------------------------|-----------------------------------------------------------------------------------------------------------------------------------|----------------------------------------------------------------------------------------------------------------------------------------------------------------------------------------------------------------------------------------------------------------------------------------------------------------------------------------------------------------------------------------------------------------------------------------------------------------------------------|---------------------------------------------------------------------------------------------------------------------------------------------------------------------------------------------------------------------------------------------------------------------------------------------------------------------------------------------------------------------------------|------------------------------------------------------------------------------------------------------------------------------------------------------------------------------------------------------------------------------------------------------------------------------------------------------------------------------------------------------------------------------------------------------------------------------------------------------------------------------------------------------------------------------------------------------------------------------------------------------------------------------------------------------------------------------------------------------------------------------------------------------------------------------|
| <p>Detemir Treat-to-Target trial, Hermansen et al., 2006 (26)</p> | <p>RCT, parallel-group, multicenter, open-label, 24-week</p> <p>Percentage decrease in A1C at 24 weeks</p> | <p>n = 453</p> <p>Inclusion criteria: ≥18 years of age, type 2 diabetes for ≥12 months, A1C 7.5–10%, BMI ≤35 kg/m<sup>2</sup></p> | <p>n = 237: insulin detemir, 10 units* before breakfast and in the evening (within 1 hour before dinner until bedtime) via pen injector</p> <p>n = 238 NPH, 10 units* before breakfast and in the evening (within 1 hour before dinner until bedtime) via pen injector</p> <p>*If initial prebreakfast or predinner plasma glucose was &lt;126 mg/dL or BMI was &lt;26 kg/m<sup>2</sup>, starting doses were reduced to 6 units</p> <p>OADs were continued at prestudy doses</p> | <p>Insulin detemir: A1C decreased by 1.8 percentage points from 8.6% (n = 237) to 6.8% (n = 230) by 24 weeks</p> <p>NPH: A1C decreased by 1.9 percentage points, from 8.5% (n = 237) to 6.6% (n = 232)</p> <p>Baseline-, country-, and OAD-adjusted means of 6.58 ± 0.06 and 6.46 ± 0.06%, fulfilling criteria for noninferiority (mean difference 0.13 [95% CI 0.00–0.25])</p> | <p>This study confirmed the feasibility of adding basal insulin with intensive dose titration to OADs as a strategy for achieving recommended glycemic targets in patients with previously poorly controlled type 2 diabetes.</p> <p>The noninferiority criterion was defined as &lt;0.4 percentage point difference in A1C.</p> <p>There were more women and a slightly higher mean A1C in the insulin detemir group.</p> <p>In each group, ~65% received combination OAD therapy, but the study excluded patients on thiazolidinediones.</p> <p>Classification of patients into responders and nonresponders was used for purposes of a titration schedule.</p> <p>The authors noted a lower risk of any hypoglycemic event and less weight gain with insulin detemir.</p> |
|-------------------------------------------------------------------|------------------------------------------------------------------------------------------------------------|-----------------------------------------------------------------------------------------------------------------------------------|----------------------------------------------------------------------------------------------------------------------------------------------------------------------------------------------------------------------------------------------------------------------------------------------------------------------------------------------------------------------------------------------------------------------------------------------------------------------------------|---------------------------------------------------------------------------------------------------------------------------------------------------------------------------------------------------------------------------------------------------------------------------------------------------------------------------------------------------------------------------------|------------------------------------------------------------------------------------------------------------------------------------------------------------------------------------------------------------------------------------------------------------------------------------------------------------------------------------------------------------------------------------------------------------------------------------------------------------------------------------------------------------------------------------------------------------------------------------------------------------------------------------------------------------------------------------------------------------------------------------------------------------------------------|

TABLE CONTINUED ON P. 3 →

**TABLE 1. Select Clinical Trials on Basal Insulin Dosing and Titration, continued from p. 2**

|                                                          |                                                                                                                                                                                                                                                                        |                                                                                                                                                                                                                                                                        |                                                                                                                                                                                  |                                                                                                                                                                                                                                                                                           |                                                                                                                                                                                                                                                                                                                                                                                                                                                                                                                                                                                                                   |
|----------------------------------------------------------|------------------------------------------------------------------------------------------------------------------------------------------------------------------------------------------------------------------------------------------------------------------------|------------------------------------------------------------------------------------------------------------------------------------------------------------------------------------------------------------------------------------------------------------------------|----------------------------------------------------------------------------------------------------------------------------------------------------------------------------------|-------------------------------------------------------------------------------------------------------------------------------------------------------------------------------------------------------------------------------------------------------------------------------------------|-------------------------------------------------------------------------------------------------------------------------------------------------------------------------------------------------------------------------------------------------------------------------------------------------------------------------------------------------------------------------------------------------------------------------------------------------------------------------------------------------------------------------------------------------------------------------------------------------------------------|
| <p>Phase 3 study, Phillis-Tsimikas et al., 2006 (27)</p> | <p>RCT, parallel-group, three-arm, multicenter, open-label, 20-week<br/>Compare the effectiveness (mean A1C at end of study) and tolerability of insulin detemir vs. NPH administered once daily with <math>\geq 1</math> OAD in poorly controlled type 2 diabetes</p> | <p>n = 504<br/>Inclusion criteria:<br/><math>\geq 18</math> years of age, type 2 diabetes <math>\geq 12</math> months, insulin naive, A1C 7.5–11%, <math>\geq 3</math> months of treatment with <math>\geq 1</math> OAD, BMI <math>\leq 40</math> kg/m<sup>2</sup></p> | <p>n = 165: morning insulin detemir, 10 units before breakfast<br/>n = 169: evening insulin detemir, 10 units before dinner<br/>n = 164: evening NPH, 10 units before dinner</p> | <p>Morning insulin detemir decreased the raw mean A1C by 1.58 percentage points, whereas evening insulin detemir and evening NPH decreased the mean by 1.48 and 1.74 percentage points, respectively</p>                                                                                  | <p>Insulin detemir administered once daily in the morning or evening can be used to improve glycemic control and may offer some tolerability advantages over NPH.<br/>The noninferiority criterion was defined as <math>&lt;0.4</math> percentage point difference in A1C.<br/>Morning and evening detemir were associated with reductions in A1C similar to those seen with evening NPH.<br/>Two major hypoglycemic episodes were recorded during the study, both in the evening insulin detemir group, with none in the other groups.<br/>OAD therapy and doses remained unchanged during the study period.</p> |
| <p>PREDICTIVE 303 trial, Meneghini et al., 2007 (28)</p> | <p>RCT, multicenter, open-label, 26-week<br/>Efficacy of a simplified patient self-adjusted algorithm vs. standard-of-care, physician-driven adjustments with regard to A1C change and A1C change from baseline to the end of the treatment period</p>                 | <p>n = 5,604<br/>Inclusion criteria:<br/><math>\geq 18</math> years of age, type 2 diabetes, A1C <math>\leq 12\%</math>, BMI <math>\leq 45</math> kg/m<sup>2</sup>, likely to benefit from insulin detemir</p>                                                         | <p>n = 2,787:<br/>303 Algorithm: insulin detemir once daily in the evening<br/>n = 389:<br/>standard-of-care algorithm, insulin detemir once daily in the evening</p>            | <p>Mean A1C with insulin detemir decreased from 8.5 to 7.9% in the 303 Algorithm group (<math>P &lt; 0.0001</math>) and decreased from 8.5 to 8% in the standard-of-care group (<math>P &lt; 0.0001</math>) with a significant difference between groups (<math>P &lt; 0.0106</math>)</p> | <p>Overall glycemic control achieved by the patient self-adjusted 303 Algorithm group was noninferior to that of the standard-of-care group, but the standard-of-care group experienced fewer hypoglycemic events.<br/>The study had broad inclusion criteria that closely resemble the U.S. type 2 diabetes population.<br/>This was a noninferiority trial.<br/>There were no forced titrations.<br/>Titration was focused on basal insulin for</p>                                                                                                                                                             |

the first 12 weeks, and then the investigator was encouraged to adjust other antidiabetic medication(s) as needed.

Only 2.3% of patients were not receiving any therapy for diabetes at randomization, and about one-third had not received any previous insulin therapy at baseline.

*FPG, fasting plasma glucose; OAD, oral antidiabetic drug; RCT, randomized controlled trial.*

**TABLE 2. Select Clinical Trials Detailing Basal Insulin Titration Methods**

| Clinical Trial                                                   | Titration Algorithm                                                                                                                                                                                                                                                                                                                                                                                                                                                                                                                                                                                                                                                                                                                                                                                                        |
|------------------------------------------------------------------|----------------------------------------------------------------------------------------------------------------------------------------------------------------------------------------------------------------------------------------------------------------------------------------------------------------------------------------------------------------------------------------------------------------------------------------------------------------------------------------------------------------------------------------------------------------------------------------------------------------------------------------------------------------------------------------------------------------------------------------------------------------------------------------------------------------------------|
| <i>Insulin glargine</i>                                          |                                                                                                                                                                                                                                                                                                                                                                                                                                                                                                                                                                                                                                                                                                                                                                                                                            |
| Treat-to-Target trial, Riddle et al., 2003 (23)                  | Glargine and NPH: forced titration schedule with weekly adjustments based on FPG: $\geq 180$ mg/dL, +8 units; 140–180 mg/dL, +6 units; 120–140 mg/dL +4 units, or 100–120 mg/dL, +2 units                                                                                                                                                                                                                                                                                                                                                                                                                                                                                                                                                                                                                                  |
| ATLANTUS trial, Davies et al., 2005 (24)                         | Algorithm 1: Physician-managed titration at weekly intervals based on FPG: 100–119 mg/dL, +0–2 units; 120–139 mg/dL, +2 units; 140–179 mg/dL, +4 units; or $\geq 180$ mg/dL, +6–8 units<br>Algorithm 2: Patient-managed titration every 3 days based on FPG: 100–119 mg/dL, +0–2 units; or $\geq 120$ mg/dL, +2 units                                                                                                                                                                                                                                                                                                                                                                                                                                                                                                      |
| INSIGHT trial, Gerstein et al., 2006 (25)                        | Glargine: self-titration of +1 unit/day if FPG was $>100$ mg/dL<br>Conventional: Physician adjustment of OADs if FPG was $>100$ mg/dL                                                                                                                                                                                                                                                                                                                                                                                                                                                                                                                                                                                                                                                                                      |
| <i>Insulin detemir</i>                                           |                                                                                                                                                                                                                                                                                                                                                                                                                                                                                                                                                                                                                                                                                                                                                                                                                            |
| Detemir Treat-to-Target trial, Hermansen et al., 2006 (26)       | Detemir and NPH: Forced titration with at least weekly adjustments based on prebreakfast and predinner plasma glucose readings for the first 12 weeks, then titrations at least every 2 weeks<br>Titrations based on whether the patient was a responder or nonresponder to previous adjustment <ul style="list-style-type: none"> <li>• For responders: <math>&gt;180</math> mg/dL, +10 units; 163–180 mg/dL, +6 units; 145–162 mg/dL, +4 units; or 109–144 mg/dL, +2 units</li> <li>• For nonresponders: <math>&gt;180</math> mg/dL, +10 units; 163–180 mg/dL, +8 units; 145–162 mg/dL, +6 units; 127–144 mg/dL, +4 units; or 109–126 mg/dL, +2 units</li> <li>• Reduce dose by 2 units for members of either group if prebreakfast plasma glucose was 50–72 mg/dL or by 4 units if <math>&lt;56</math> mg/dL</li> </ul> |
| Phase 3 study, Phillis-Tsimikas et al., 2006 (27)                | Titration once every 4 weeks based on the mean of three preprandial plasma glucose readings measured on 3 consecutive days: $\leq 108$ mg/dL, no change; 109–144 mg/dL, +2 units; 145–162 mg/dL, +4 units; 163–180 mg/dL, +6 units; or $\geq 180$ mg/dL, +8 units<br>Reduce dose by 4 units or 10% if dose was $>40$ units if $\geq 1$ value was $<56$ mg/dL without an obvious explanation, and reduce by 2 units or 5% if dose was $>40$ mg/dL for $\geq 1$ value was 56–72 mg/dL without an obvious explanation                                                                                                                                                                                                                                                                                                         |
| PREDICTIVE 303 trial, Meneghini et al., 2007 (28)                | 303 Algorithm: self-adjust every 3 days based on an average of three daily self-measured FPG values: $>110$ mg/dL, +3 units; 80–110 mg/dL, no change; or $<80$ mg/dL, –3 units<br>Standard-of-care algorithm: doses adjusted by investigator according to the standard of care using an average FPG over the last 6 days before each scheduled visit, with no specified frequency                                                                                                                                                                                                                                                                                                                                                                                                                                          |
| <i>FPG, fasting plasma glucose; OAD, oral antidiabetic drug.</i> |                                                                                                                                                                                                                                                                                                                                                                                                                                                                                                                                                                                                                                                                                                                                                                                                                            |

**TABLE 3. Select Clinical Trials on Bolus Insulin Dosing and Titration**

| Clinical Trial                         | Design/Primary Objective                                                                                                                                                                                                                                      | Population                                                                                                                                             | Intervention                                                                                                                                                                                                                                                               | Results                                                                                                                                                                                                                                                                                                                                                                                                  | Comments/Conclusions                                                                                                                                                                                                                                                                                                                                                                             |
|----------------------------------------|---------------------------------------------------------------------------------------------------------------------------------------------------------------------------------------------------------------------------------------------------------------|--------------------------------------------------------------------------------------------------------------------------------------------------------|----------------------------------------------------------------------------------------------------------------------------------------------------------------------------------------------------------------------------------------------------------------------------|----------------------------------------------------------------------------------------------------------------------------------------------------------------------------------------------------------------------------------------------------------------------------------------------------------------------------------------------------------------------------------------------------------|--------------------------------------------------------------------------------------------------------------------------------------------------------------------------------------------------------------------------------------------------------------------------------------------------------------------------------------------------------------------------------------------------|
| <i>Insulin glulisine</i>               |                                                                                                                                                                                                                                                               |                                                                                                                                                        |                                                                                                                                                                                                                                                                            |                                                                                                                                                                                                                                                                                                                                                                                                          |                                                                                                                                                                                                                                                                                                                                                                                                  |
| OPAL trial, Lankisch et al., 2008 (30) | Stratified, 1:1 randomization, open-label, parallel-group, (per-protocol treatment group), 24-week<br>Investigate efficacy of the addition of a glulisine injection either before breakfast or before the main meal                                           | n = 316<br>Inclusion criteria: type 2 diabetes, ≥18 years of age, glargine + OADs for ≥3 months, able to perform SMBG                                  | n = 162: breakfast injection<br>n = 154: main mealtime injection<br>No information regarding specific initiation doses provided for either group                                                                                                                           | Overall A1C improvement from 7.32 ± 0.70 to 6.99 ± 0.83%*<br>Breakfast group: from 7.35 ± 0.71 to 7.03 ± 0.79%*<br>Main-meal group: from 7.29 ± 0.69 to 6.94 ± 0.87%*<br>*These results were statistically significant (P < 0.0001) vs. baseline<br>Primary efficacy analysis: breakfast treatment arm differed from main-meal arm absolute A1C by 0.0481 percentage points (P > 0.0001 for equivalence) | Addition of a single daily injection of glulisine improved A1C and postprandial plasma glucose.<br>Equivalence was shown regardless of administration meal without significant difference in hypoglycemic events.                                                                                                                                                                                |
| Owens et al., 2011 (31)                | Parallel-group, RCT, open-label, 3-month run-in and 3-month randomized treatment period (run-in: transferred to glargine and titrated)<br>Investigate the efficacy of initiating and titrating a single dose of glulisine to baseline insulin glargine + OADs | n = 106<br>Inclusion criteria: type 2 diabetes 18–75 years of age, BMI 25–45 kg/m <sup>2</sup> , A1C 7.5–9.5%, basal insulin + metformin for >3 months | n = 57: basal-only group<br>n = 49: basal-bolus group<br>Initial glulisine doses: postprandial glucose level after the main meal in mmol/L divided by 2 (Russia and United Kingdom); 6 units before the main meal with a 6-unit reduction in glargine dose (United States) | A1C reduction 3 months after randomization was significantly greater in basal-bolus group (−0.37 vs. −0.11%, P = 0.0290)<br>Primary end point (A1C <7%) reached more frequently in basal-bolus group (mITT 22.4 vs. 8.8%, per-protocol population 24.4 vs. 7.8%, P < 0.05 and P = 0.0254, respectively)                                                                                                  | Addition of a single glulisine dose before the meal with largest postprandial glucose excursion significantly improved A1C.<br>Improvement in A1C, mean daily glucose levels, diurnal glucose profile, and variability in mean daily glucose was seen with basal-bolus in comparison to basal-only regimen.<br>Significant increases in hypoglycemia frequency or weight gain were not observed. |

TABLE CONTINUED ON P. 7 →

TABLE 3. Select Clinical Trials on Bolus Insulin Dosing and Titration, continued from p. 7

| Clinical Trial                           | Design/Primary Objective                                                                                                                                                                                                                        | Population                                                                                                                                                                                                                                                | Intervention                                                                                                                                                                                                                                                                                                                                                                                                                                             | Results                                                                                                                                                                                                                                                                                                                                                                      | Comments/Conclusions                                                                                                                                                                             |
|------------------------------------------|-------------------------------------------------------------------------------------------------------------------------------------------------------------------------------------------------------------------------------------------------|-----------------------------------------------------------------------------------------------------------------------------------------------------------------------------------------------------------------------------------------------------------|----------------------------------------------------------------------------------------------------------------------------------------------------------------------------------------------------------------------------------------------------------------------------------------------------------------------------------------------------------------------------------------------------------------------------------------------------------|------------------------------------------------------------------------------------------------------------------------------------------------------------------------------------------------------------------------------------------------------------------------------------------------------------------------------------------------------------------------------|--------------------------------------------------------------------------------------------------------------------------------------------------------------------------------------------------|
| GINGER trial, Fritsche et al., 2010 (32) | Open-label, active-controlled, parallel-group using 1:1 randomization, 52-week<br>Compare once-daily glargine plus mealtime glulisine with a twice-daily premixed insulin regimen in patients currently on premixed therapy                     | n = 287 (per-protocol population)<br>Inclusion criteria: type 2 diabetes for ≥5 years, 18–75 years of age, A1C 7.5–11.0%, stable regimen of premixed insulin (NPH/regular, NPH/lispro, or NPH/aspart in a 70/30 or 75/25 ratio) ± metformin for ≥3 months | n = 141: glargine-glulisine<br>Initial doses:<br>• Glargine: ~50% TDD at baseline; minimum recommended dose of 16 units daily<br>• Glulisine: ~50% TDD at baseline divided into three preprandial doses; minimum recommended mealtime dose of 6 units insulin<br>Initial dose unchanged from baseline                                                                                                                                                    | Primary end point (change A1C from baseline) 1.31 vs. -0.80 percentage points in favor of basal-bolus; statistically significant<br>Basal-bolus regimen maintained superiority, providing significantly better adjusted mean reductions in A1C than either premixed regimen<br>46.6% of basal-bolus patients achieved A1C ≤7% compared to 27.9% of premixed insulin patients | Combination of once-daily glargine plus mealtime glulisine was superior to twice-daily premixed prandial insulin over 12 months.<br>More patients in the basal-bolus group reached the goal A1C. |
| Riddle et al., 2014 (33)                 | RCT, open-label, 60-week<br>Determine whether basal insulin plus one prandial injection is as effective as premixed insulin; determine whether stepwise progression to basal-plus-prandial insulin at each meal is superior to premixed insulin | n = 582<br>Inclusion criteria: type 2 diabetes, 18–70 years of age, A1C ≥7.5 and ≤10%, on insulin therapy (minimum 2 injections per day) ± metformin for minimum of 3 months                                                                              | n = 194: twice-daily premixed injections (premixed)<br>Initial premixed dose: 5 units 15 minutes before breakfast, and 5 units 15 minutes before dinner<br>n = 194: once-daily glargine plus 0–1 glulisine injection (G + 1)<br>Initial doses:<br>Glargine, 10 units daily; glulisine, 6 units daily; recommended reduction in glargine dose by 6 units<br>n = 194: glargine plus 0–3 glulisine injections (G + 3)<br>Initial dosing same as G + 1 group | Co-primary outcomes:<br>• Adjusted mean change in A1C: -2.3 percentage points for G + 1 and -2.0 percentage points for premixed group; not statistically significant<br>• Attainment of A1C <7.0%: 44.1% of participants (G + 3) compared to 38.1% (premixed)*<br>*Statistically significant only when data from sites nonadherent to the protocol were included             | Combination of once-daily glargine plus mealtime glulisine was superior to twice-daily premixed prandial insulin over 12 months.<br>More patients in the basal-bolus group reached the goal A1C. |

Insulin aspart

|                                                                                |                                                                                                                                                                                                                                                                                                                                                                                                                                                                                                                                                                                                                                                                                                                                                                                                                                                                                                                        |                                                                                                                                                                                                                                                                                                                                                                                                                                                                                                                                                             |
|--------------------------------------------------------------------------------|------------------------------------------------------------------------------------------------------------------------------------------------------------------------------------------------------------------------------------------------------------------------------------------------------------------------------------------------------------------------------------------------------------------------------------------------------------------------------------------------------------------------------------------------------------------------------------------------------------------------------------------------------------------------------------------------------------------------------------------------------------------------------------------------------------------------------------------------------------------------------------------------------------------------|-------------------------------------------------------------------------------------------------------------------------------------------------------------------------------------------------------------------------------------------------------------------------------------------------------------------------------------------------------------------------------------------------------------------------------------------------------------------------------------------------------------------------------------------------------------|
| <p>Step-Wise (SimpleSTEP and ExtraSTEP) trial, Meneghini et al., 2011 (36)</p> | <p>RCT, parallel-group, open-label, 48-week</p> <p>Investigate whether the SimpleSTEP strategy is equivalent to the ExtraSTEP strategy (in terms of glycemic control and tolerability)</p> <p>Inclusion criteria:<br/>                 ≥18 years of age, type 2 diabetes for ≥6 months, A1C 7.5–10%, on basal insulin (NPH, glargine, or detemir) + 1–3 OADs</p> <p>n = 296</p> <p>SimpleSTEP</p> <p>Initial dosing: Detemir run-in phase; basal insulin switched to once-daily bedtime detemir unit-for-unit (exception: 20% dose reduction when converting from twice-daily NPH); minimum initial detemir dose, 10 units; aspart, 4 units per meal</p> <p>n = 150:</p> <p>Sequential addition of insulin aspart improved glycemic control when intensification is needed.</p> <p>The SimpleSTEP method was as effective as ExtraSTEP.</p>                                                                            | <p>Primary end point (reduction in A1C after 36 weeks):</p> <ul style="list-style-type: none"> <li>SimpleSTEP: 1.2 percentage point decrease (7.5 ± 1.1%)</li> <li>ExtraSTEP: 1.2 percentage point decrease (7.7 ± 1.2%)</li> </ul> <p>Estimated treatment difference: 0.06% (not statistically significant)</p>                                                                                                                                                                                                                                            |
| <p>FullSTEP trial, Rodbard et al., 2014 (37)</p>                               | <p>RCT, parallel-group, open-label, 32-week screening period followed by 8-week run-in to convert and adjust detemir (dosed once daily at bedtime)</p> <p>Investigate the sequential, incremental addition of up to three prandial insulin injections compared to full basal-bolus insulin therapy</p> <p>Inclusion criteria:<br/>                 ≥18 years of age, type 2 diabetes for ≥12 months, A1C 7–9%, on basal insulin (NPH, glargine, or detemir) for ≥6 months before study start</p> <p>n = 401</p> <p>Stepwise</p> <p>4 units aspart before largest meal; addition of bolus doses before next largest meal at weeks 11 and 22 if A1C ≥7%</p> <p>n = 201:</p> <p>Stepwise</p> <p>4 units aspart before largest meal; addition of bolus doses before next largest meal at weeks 11 and 22 if A1C ≥7%</p> <p>n = 200:</p> <p>basal-bolus</p> <p>2 units aspart daily before breakfast, lunch, and dinner</p> | <p>Change in A1C from baseline: 0.98 percentage points (95% CI 1.09 to -0.87) for stepwise group compared to -1.12% (95% CI 1.23–1.00%) for basal-bolus group</p> <p>Significantly more patients in basal-bolus group reached target A1C at end of first treatment period; difference was not significant at study completion</p> <p>The stepwise regimen was noninferior to full basal-bolus therapy.</p> <p>Hypoglycemia incidence was lower in the stepwise group.</p> <p>Patient satisfaction regarding treatment was higher in the stepwise group.</p> |



TABLE 3. Select Clinical Trials on Bolus Insulin Dosing and Titration, continued from p. 7

| Clinical Trial               | Design/Primary Objective                                                                                                                                                                                                                                                                                                                                                                                    | Population                                                                                                                                                                              | Intervention                                                                                                                                                                                                                                                                          | Results                                                                                                                                                                                                                                                                                                                                                                                                              | Comments/Conclusions                                                                                                                                                                                                                                                                                                                                                     |
|------------------------------|-------------------------------------------------------------------------------------------------------------------------------------------------------------------------------------------------------------------------------------------------------------------------------------------------------------------------------------------------------------------------------------------------------------|-----------------------------------------------------------------------------------------------------------------------------------------------------------------------------------------|---------------------------------------------------------------------------------------------------------------------------------------------------------------------------------------------------------------------------------------------------------------------------------------|----------------------------------------------------------------------------------------------------------------------------------------------------------------------------------------------------------------------------------------------------------------------------------------------------------------------------------------------------------------------------------------------------------------------|--------------------------------------------------------------------------------------------------------------------------------------------------------------------------------------------------------------------------------------------------------------------------------------------------------------------------------------------------------------------------|
| <i>Insulin lispro</i>        |                                                                                                                                                                                                                                                                                                                                                                                                             |                                                                                                                                                                                         |                                                                                                                                                                                                                                                                                       |                                                                                                                                                                                                                                                                                                                                                                                                                      |                                                                                                                                                                                                                                                                                                                                                                          |
| Jain et al., 2010 (38)       | RCT, open-label, active-controlled, 36-week<br>Evaluate two approaches to starting and intensifying insulin therapy: premixed-insulin progression compared to a basal-bolus regimen                                                                                                                                                                                                                         | n = 484 (randomized)<br>Inclusion criteria:<br>30–80 years of age, type 2 diabetes, A1C 7.5–12.0%, on $\geq 2$ oral diabetes medications for $\geq 90$ days and insulin naive           | n = 211: premixed Lispro mix 50/50: 10 units before the evening meal*<br>n = 215: basal/bolus (glargine + lispro); glargine 10 units at the same time each morning*<br>*Initial dosing 12 units if FBG $\geq 180$ mg/dL                                                               | Change in A1C from baseline to end point: $-1.76 \pm 0.37$ percentage points (premixed) and $-1.93 \pm 0.36$ percentage points (glulisine + lispro); between-group difference not statistically significant (0.17%, $P = 0.097$ )*<br>*Noninferiority was not achieved based on 95% CI $-0.03$ to $0.37$ ; upper limit of CI set at $>0.3\%$<br>Hypoglycemia difference between groups not statistically significant | Both premixed and glulisine + lispro regimens were effective in lowering A1C, although noninferiority was not demonstrated.<br>The article includes discussion regarding barriers to increasing the number of injections vs. clinical inertia despite patients not reaching the A1C goal.                                                                                |
| Rosenstock et al., 2008 (39) | RCT, open-label, active-controlled, 24-week, initial randomization: conservative vs. aggressive dosing algorithm, based on plasma glucose levels and total daily insulin requirement ( $<100$ units or $>100$ units); initial dose based on entry glargine dose<br>Compare two analog insulin therapies: prandial premixed therapy vs. basal-bolus therapy in patients currently treated with basal insulin | n = 374 (randomized)<br>Inclusion criteria:<br>30–75 years, type 2 diabetes, A1C 7.5–12.0%, on insulin glargine ( $\geq 30$ units/day) for $\geq 90$ days, in combination with 1–3 OADs | n = 158: premixed lispro 50/50 mix three times daily with meals; investigators were allowed to switch evening dose to lispro 75/25 mix if FPG remained $>110$ mg/dL during the study<br>n = 158: basal/bolus 50% glargine and 50% divided into three equal doses of lispro with meals | Mean reduction in A1C: $-1.87$ percentage points (prandial premixed therapy) and $-2.9\%$ (basal-bolus therapy); difference not statistically significant (0.22% [95% CI $-0.38$ to $-0.07$ ])*<br>*Noninferiority was not achieved based on upper limit of CI set at $>0.3\%$<br>Hypoglycemia difference between groups not statistically significant                                                               | Both prandial premixed therapy and basal-bolus therapy regimens were effective in lowering A1C, although noninferiority was not demonstrated.<br>More patients in the basal-bolus group reached the A1C target; this may be attributable to investigator familiarity with basal-bolus therapy over prandial premixed therapy.<br>Rates of hypoglycemia were low overall. |

mITT, modified intention-to-treat; OAD, oral antidiabetic drug; RCT, randomized, controlled trial; TDD, total daily dose.

TABLE 4. Select Clinical Trials Detailing Bolus Insulin Titration Methods

| Clinical Trial                           | Titration Algorithm                                                                                                                                                                                                                                                                                                                                                                                                                                                                                                                                                                                                                                                                                                                                                                                                                                                                                                                                                                                       |
|------------------------------------------|-----------------------------------------------------------------------------------------------------------------------------------------------------------------------------------------------------------------------------------------------------------------------------------------------------------------------------------------------------------------------------------------------------------------------------------------------------------------------------------------------------------------------------------------------------------------------------------------------------------------------------------------------------------------------------------------------------------------------------------------------------------------------------------------------------------------------------------------------------------------------------------------------------------------------------------------------------------------------------------------------------------|
| <i>Insulin glulisine</i>                 |                                                                                                                                                                                                                                                                                                                                                                                                                                                                                                                                                                                                                                                                                                                                                                                                                                                                                                                                                                                                           |
| OPAL trial, Lankisch et al., 2008 (30)   | Titration based on investigator discretion and prespecified prandial and FPG goals<br>Glargine dose adjustments according to target FBG $\leq 100$ mg/dL<br>Glulisine dose adjustments according to goal of 2-hour postprandial glucose $\leq 135$ mg/dL and FBG $\leq 100$ mg/dL<br>Details regarding magnitude of specific dose adjustments not provided                                                                                                                                                                                                                                                                                                                                                                                                                                                                                                                                                                                                                                                |
| Owens et al., 2011 (31)                  | Glargine titrated per Treat-to-Target algorithm to achieve FBG $\leq 100$ mg/dL (during run-in period)<br>United Kingdom and Russia: weekly glulisine adjustment based on 2-hour postprandial glucose with target $\leq 135$ mg/dL; no change; 135–153 mg/dL, +1 unit; 153–180 mg/dL +2 units; or >180 mg/dL, +3 units<br>United States: postprandial (immediately before the next meal) plasma glucose target 100–120 mg/dL or at bedtime if the main meal was dinner: 120–140 mg/dL, +1 unit; or 140–180 mg/dL, +2 units                                                                                                                                                                                                                                                                                                                                                                                                                                                                                |
| GINGER trial, Fritsche et al., 2010 (32) | Titration targets were the same for both regimens: FBG $\leq 100$ mg/dL and postprandial glucose $\leq 135$ mg/dL<br>Premixed insulin: mean of prebreakfast plasma glucose values over 2 consecutive days was used to calculate the increase in predinner dose; mean of predinner plasma glucose values over 2 consecutive days was used to calculate the increase in the prebreakfast dose. Adjustment of premixed insulin was based on the highest value of preprandial plasma glucose over 2 consecutive days: >100–120 mg/dL, +2 units; >120–140 mg/dL, +4 units; 140–160 mg/dL, +6 units; or >160 mg/dL, +8 units<br>Glargine: adjustment was based on the highest value of FBG over 2 consecutive days: >100–120 mg/dL, +2 units; >120–140 mg/dL, +4 units; >140–160 mg/dL, +6 units; or >160 mg/dL, +8 units<br>Glulisine: adjustment based on the highest value of postprandial plasma glucose over 2 consecutive days: >135–160 mg/dL +1 unit; >160–200 mg/dL, +2 units; or >200 mg/dL, +3 units |
| Riddle et al., 2013 (33)                 | Glargine: weekly adjustment based on median fasting 3-day SMBG: >180 mg/dL, +8 units; 140–180 mg/dL, +6 units; 120–139 mg/dL, +4 units; 110–119 mg/dL, +2 units; 101–109 mg/dL, +2 units or no change; 70–100 mg/dL, no change; or <70 mg/dL, decrease dose by 10%<br>Premixed insulin: morning dose adjustment was based on median of prelunch or predinner SMBG. Evening dose adjustment was based on the median of before-bedtime or fasting SMBG: >180 mg/dL, +4 units; 140–180 mg/dL, +3 units; 120–139 mg/dL, +2 units; 110–119 mg/dL, +1 unit; 101–109 mg/dL, +1 unit or no change; 70–100 mg/dL, no change; or <70 mg/dL, decrease dose by 10%<br>Glulisine: weekly adjustment based on median of three SMBG values before bedtime or premeal: >180 mg/dL, +4 units; 140–180 mg/dL, +3 units; 120–139 mg/dL, +2 units; 101–119 mg/dL, +1 unit; 70–100 mg/dL, no change; or <70 mg/dL, decrease insulin glargine dose by 10%                                                                       |

TABLE CONTINUED ON P. 12 →

**TABLE 4. Select Clinical Trials Detailing Bolus Insulin Titration Methods, continued from p. 10**

|                                                                                                           |                                                                                                                                                                                                                                                                                                                                                                                                                                                                                                                                                                                                                                                                                                                                                                                                                                                                                                                                                                                                                                                                                                                                                                                                                                                                                                                                                                                                                                                                                                                                                                                                                                                                                                                                                                                                                                                                                                                                                                                                                                                          |
|-----------------------------------------------------------------------------------------------------------|----------------------------------------------------------------------------------------------------------------------------------------------------------------------------------------------------------------------------------------------------------------------------------------------------------------------------------------------------------------------------------------------------------------------------------------------------------------------------------------------------------------------------------------------------------------------------------------------------------------------------------------------------------------------------------------------------------------------------------------------------------------------------------------------------------------------------------------------------------------------------------------------------------------------------------------------------------------------------------------------------------------------------------------------------------------------------------------------------------------------------------------------------------------------------------------------------------------------------------------------------------------------------------------------------------------------------------------------------------------------------------------------------------------------------------------------------------------------------------------------------------------------------------------------------------------------------------------------------------------------------------------------------------------------------------------------------------------------------------------------------------------------------------------------------------------------------------------------------------------------------------------------------------------------------------------------------------------------------------------------------------------------------------------------------------|
| <p><i>Insulin aspart</i></p>                                                                              | <p>Treatment intensification with addition of aspart injection (<math>\leq 3</math> boluses/day) every 12 weeks if A1C remained <math>&gt;7\%</math></p> <p>SimpleSTEP: titration based on premeal plasma glucose; addition of aspart to largest meal</p> <p>ExtraSTEP: titration based on postmeal values; addition of aspart to meal with largest prandial plasma glucose increment</p> <p>Detemir: titration based on average of three FPG (prebreakfast) measurements: <math>&lt;56</math> mg/dL, <math>-4</math> units; <math>56-71</math> mg/dL, <math>-2</math> units; <math>72-108</math> mg/dL, no change; <math>109-144</math> mg/dL, <math>+2</math> units; <math>145-162</math> mg/dL, <math>+4</math> units; or <math>&gt;162</math> mg/dL, <math>+6</math> units</p> <p>Aspart (SimpleSTEP): titration based on four daily plasma glucose measurements: <math>&lt;72</math> mg/dL premeal or at bedtime, <math>-2</math> units; <math>72-108</math> mg/dL premeal or <math>72-144</math> mg/dL at bedtime, no change; <math>109-162</math> mg/dL premeal or <math>145-180</math> mg/dL at bedtime, <math>+2</math> units; or <math>&gt;162</math> mg/dL premeal or <math>&gt;180</math> mg/dL at bedtime, <math>+4</math> units</p> <p>Aspart (ExtraSTEP): titration based on six daily plasma glucose measurements: <math>&lt;72</math> mg/dL, <math>-2</math> units; <math>72-144</math> mg/dL, no change; <math>145-180</math> mg/dL, <math>+2</math> units; or <math>&gt;180</math> mg/dL, <math>+4</math> units</p> <p>Detemir: titration based on average of three consecutive FPG (prebreakfast) measurements: <math>\leq 70</math> mg/dL, <math>-3</math> units; <math>71-130</math> mg/dL, no change; or <math>&gt;130</math> mg/dL, <math>+3</math> units</p> <p>Aspart: each dose was titrated independently based on premeal and/or bedtime SMBG after the bolus injection(s): <math>\leq 70</math> mg/dL, <math>-1</math> unit; <math>71-130</math> mg/dL, no change; or <math>&gt;130</math> mg/dL, <math>+1</math> unit</p> |
| <p><i>Insulin lispro</i></p>                                                                              | <p>Premix: increase to twice or three times daily; if on premix three times daily for <math>\geq 6</math> weeks and FPG <math>&gt;100</math> mg/dL, dinnertime 50/50 switched to lispro mix 75/25</p> <p>Glargine plus lispro progression: glargine supplemented with 1-3 prandial lispro injections</p> <p>Glargine: titration based on average of at least two readings: <math>&lt;80</math> mg/dL, <math>-2</math> units; <math>81-100</math> mg/dL, no change; <math>101-120</math> mg/dL, <math>+2</math> units; <math>121-140</math> mg/dL, <math>+4</math> units; <math>141-160</math> mg/dL, <math>+6</math> units, or <math>\geq 161</math> mg/dL, <math>+8</math> units</p> <p>Lispro mix 50/50 or insulin lispro: adjusted at least weekly for the first 10 weeks, then at least once every 2 weeks for the next 8 weeks, then every 3 weeks: <math>&lt;80</math> mg/dL at bedtime or fasting/preprandial, <math>-2</math> units (starting the next day); <math>81-110</math> mg/dL at bedtime or <math>81-100</math> mg/dL preprandial, no change; <math>111-139</math> mg/dL at bedtime or <math>101-139</math> mg/dL preprandial, <math>+2</math> units; <math>140-179</math> mg/dL at bedtime or <math>140-179</math> mg/dL preprandial, <math>+4</math> units or <math>\geq 180</math> mg/dL at bedtime or fasting/preprandial, <math>+6</math> units</p>                                                                                                                                                                                                                                                                                                                                                                                                                                                                                                                                                                                                                                                                                |
| <p>Rosenstock et al., 2008 (39)</p>                                                                       | <p>Conservative vs. aggressive dosing algorithm based on plasma glucose levels and TDD (<math>&lt;100</math> or <math>\geq 100</math> units); initial dose based on entry glargine dose</p> <p>Basal: stratified into TDD <math>&lt;100</math> or <math>\geq 100</math> units; based on preprandial plasma glucose: <math>110-150</math> mg/dL, <math>+2</math> units (conservative) or <math>+4</math> units (aggressive); <math>151-200</math> mg/dL, <math>+4</math> units (conservative) or <math>+8</math> units (aggressive); <math>201-250</math> mg/dL, <math>+6</math> units (conservative) or <math>+12</math> units (aggressive); <math>251-300</math> mg/dL, <math>+8</math> units (conservative) or <math>+16</math> units (aggressive), or <math>&gt;300</math> mg/dL, <math>+10</math> units (conservative) or <math>+20</math> units (aggressive)</p> <p>Bolus: based on preprandial plasma glucose: <math>110-200</math> mg/dL, <math>+2</math> units; <math>201-300</math> mg/dL, <math>+3</math> units; or <math>&gt;300</math> mg/dL, <math>+4</math> units</p>                                                                                                                                                                                                                                                                                                                                                                                                                                                                                                                                                                                                                                                                                                                                                                                                                                                                                                                                                                      |
| <p><i>FPG, fasting plasma glucose, SMBG, self-monitoring of blood glucose, TDD, total daily dose.</i></p> |                                                                                                                                                                                                                                                                                                                                                                                                                                                                                                                                                                                                                                                                                                                                                                                                                                                                                                                                                                                                                                                                                                                                                                                                                                                                                                                                                                                                                                                                                                                                                                                                                                                                                                                                                                                                                                                                                                                                                                                                                                                          |
